# Supplementary material for: Affective Economy: A Theoretical Outline
Source: MDPI journal article supplement (doi:10.3390/encyclopedia3030074), 2023-08-25
Supplement: s1 [file s1]

## Supplementary Materials

The article is the result of a narrative literary review conducted on scientific publications related to the social sciences [12]. The research was carried out by querying citation databases such as EBSCO, SCOPUS, and GOOGLE SCHOLAR, identifying sources most relevant to the topic and providing a description of the specific subjects discussed. The research specifically focused on literature produced in the last two decades, starting from Sara Ahmed's book "The Cultural Politics of Emotion," which is recognized as the volume that introduced the concept of Affective Economy into the current scientific debate.

### References

[12] Green, B.N.; Johnson, C.D.; Adams, A. Writing narrative literature reviews for peer-reviewed journals: secrets of the trade. *Journal of Chiropractic Medicine* **2006**, *5*, 101-117, doi:10.1016/s0899-3467(07)60142-6.
