# Supplementary material for: Affective Economy: A Theoretical Outline
Source: MDPI journal article supplement (doi:10.3390/encyclopedia3030074), 2023-08-25
Supplement: s1 [file s1]

Archive with 1 entries (1 files):
- encyclopedia-2551633-supplementary.pdf
